# Supplementary material
Source: PubMed Central journal article supplement (PMC3432796)
Supplement: embor2012100s1.pdf [file embor2012100s1.pdf]

## Supplementary Information

### Supplementary figures

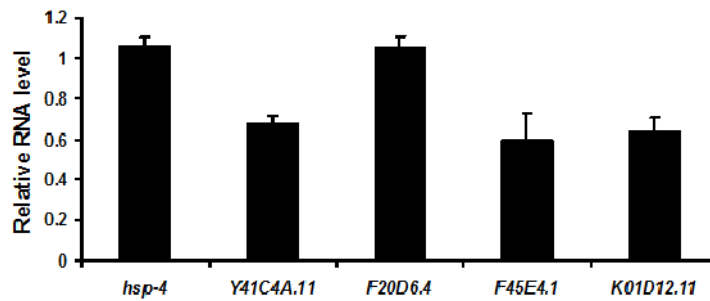

**Figure S1.** Expression of XBP-1-mediated genes in eggs obtained from WT and *octr-1(ok371)* one-day old adult animals. qRT-PCR analysis of *hsp-4*, *Y41C4A.11*, *F20D6.4*, *F45E4.1* and *K01D12.11* expression in eggs of *octr-1(ok371)* relative to WT animals exposed to *P. aeruginosa* PA14. n=3 independent experiments; error bars represent SEM.

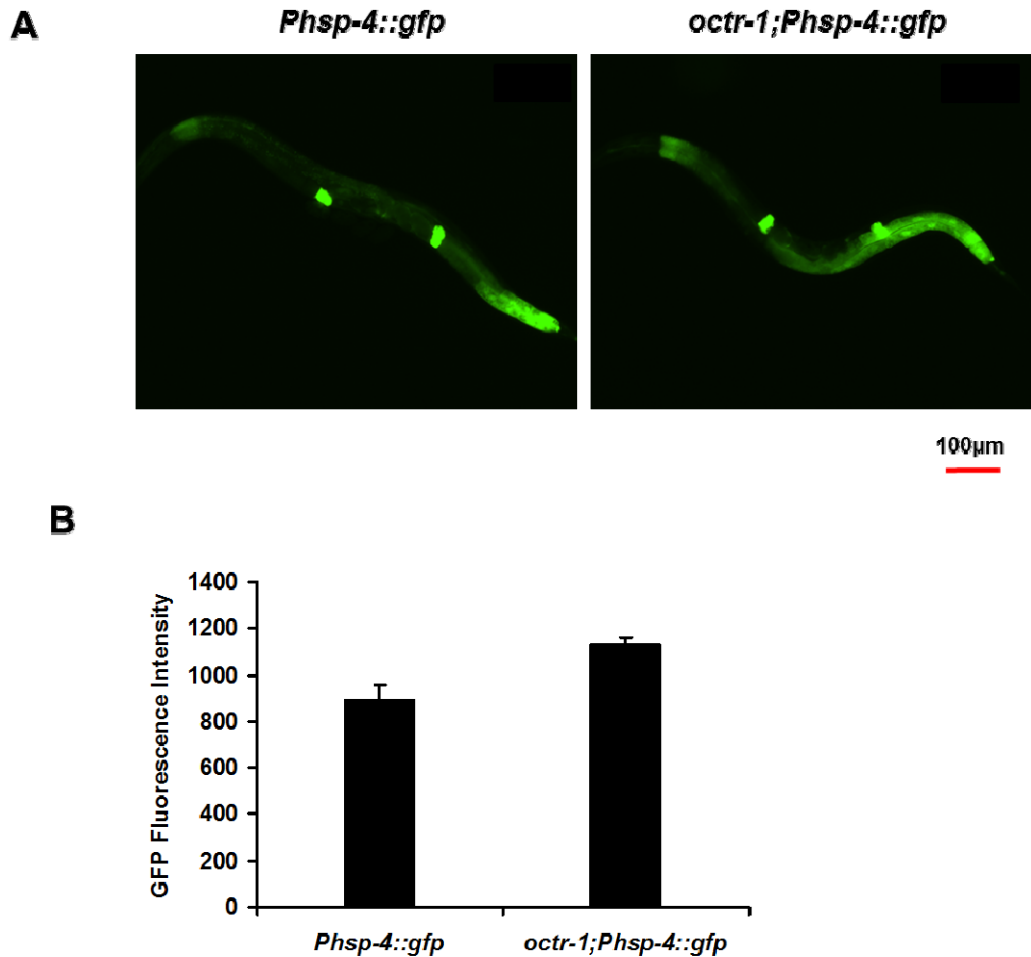

**Figure S2.** Loss of OCTR-1 signaling enhances the activation of XBP-1-mediated UPR pathway. (A). Images of *Phsp-4::GFP(zcIs4)* and *octr-1(ok371);Phsp-4::GFP(zcIs4)* one-day old animals exposed to *E. coli* OP50. Animals that best represent the fluorescence level of the population were shown. (B). GFP quantification from *Phsp-4::GFP(zcIs4)* and *octr-1(ok371);Phsp-4::GFP(zcIs4)* one-day old animals exposed to *E. coli* OP50. Binary mean intensity of the region of interest (ROI) that corresponds to an entire animal was measured by NIS-Elements AR 3.2 software. N=10-20, error bars represent SEM. *octr-1(ok371);Phsp-4::GFP(zcIs4)* versus *Phsp-4::GFP(zcIs4)* on *E. coli* OP50: P<0.05.

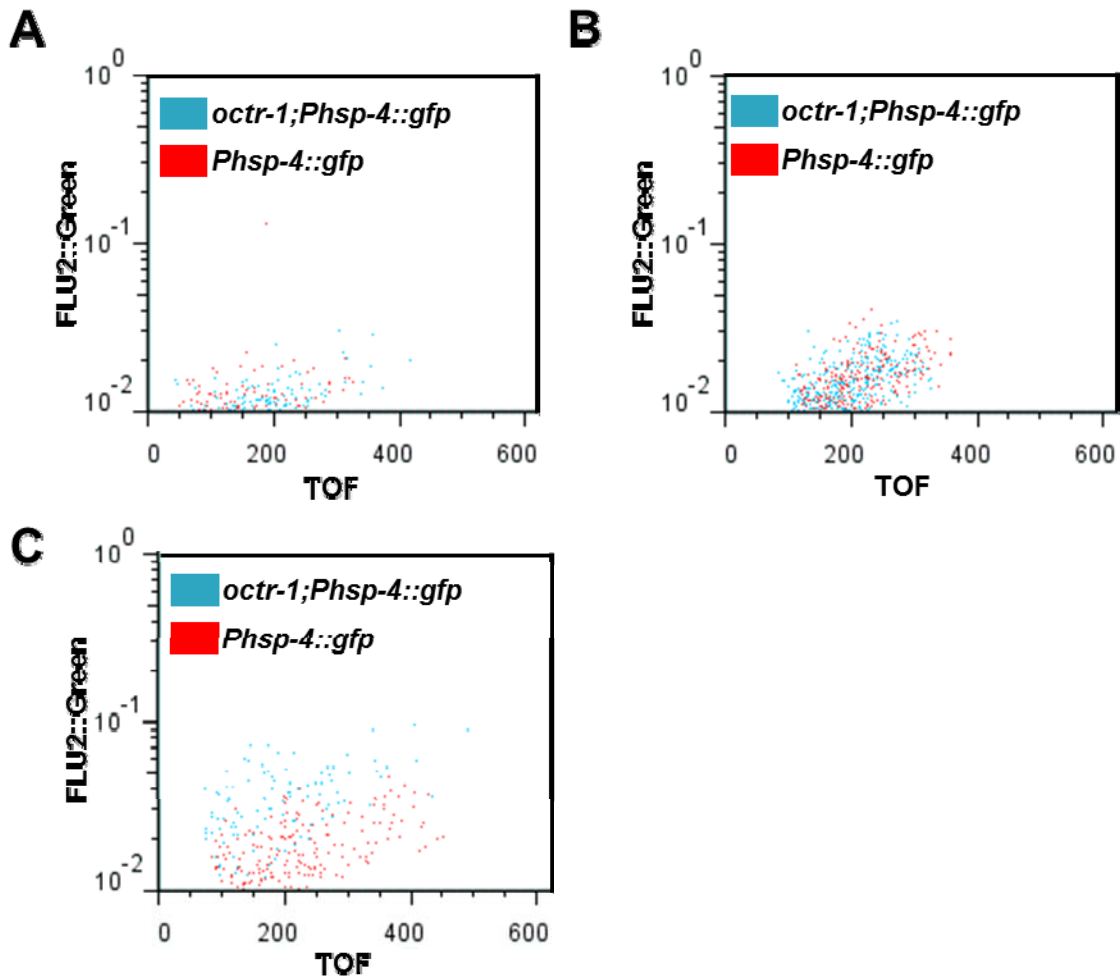

**Figure S3.** Expression levels of the transgenic transcriptional reporter *Phsp-4::GFP(zcIs4)* and *octr-1;Phsp-4::GFP(zcIs4)* exposed to *P. aeruginosa*. GFP fluorescence intensity (FLU2) was plotted against animal size, measured as time of flight (TOF). Each dot represents an individual animal. (A). L3 animals. *Phsp-4::GFP(zcIs4)* versus *octr-1;Phsp-4::GFP(zcIs4)*:  $P=1.0$ . (B). L4 animals. *Phsp-4::GFP(zcIs4)* versus *octr-1;Phsp-4::GFP(zcIs4)*:  $P=1.0$ . (C). Young adult animals. *Phsp-4::GFP(zcIs4)* versus *octr-1;Phsp-4::GFP(zcIs4)*:  $P<0.0001$ .

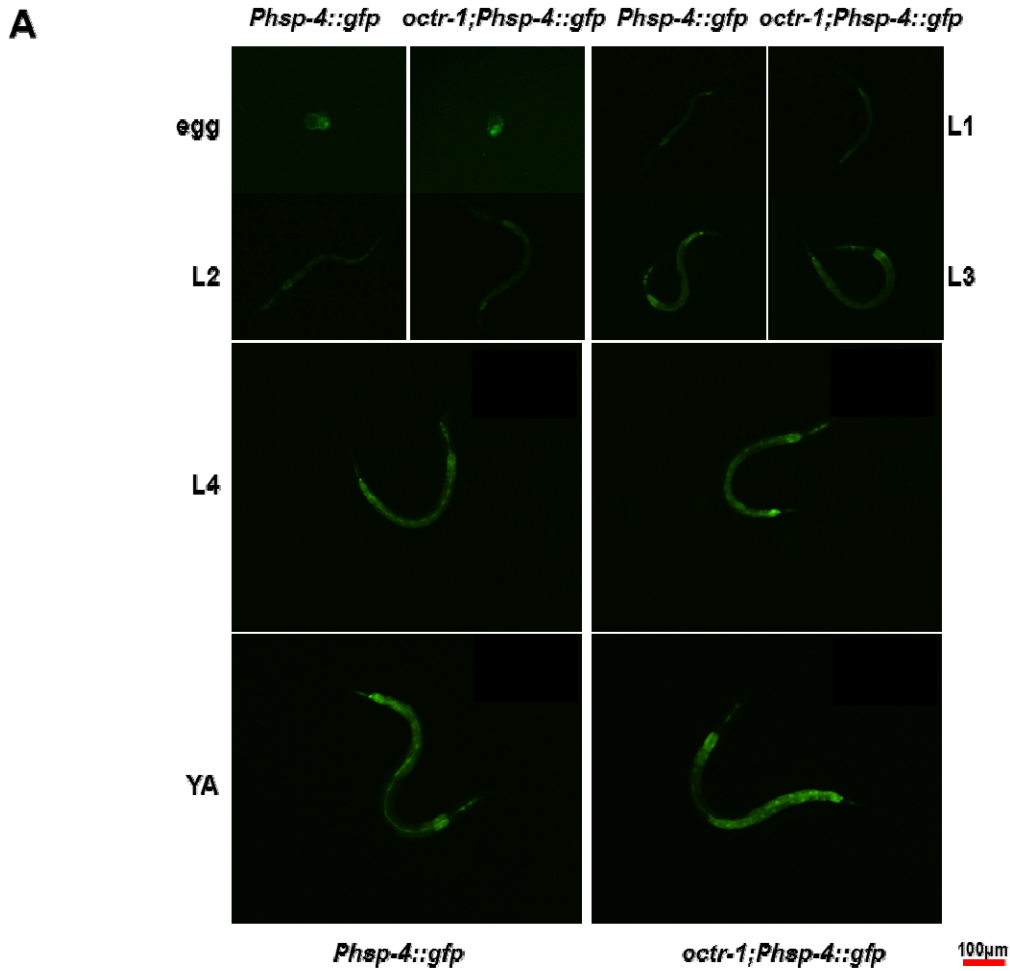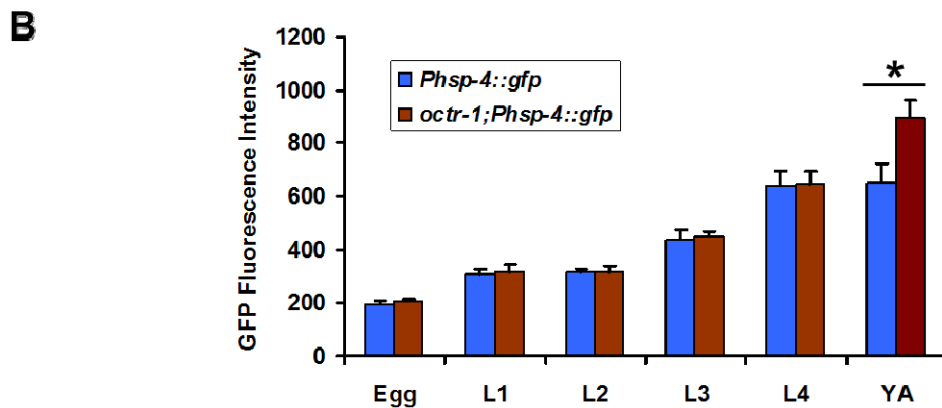

**Figure S4.** OCTR-1 controls XBP-1-mediated UPR in uninfected young adult animals. (A). Images of *Phsp-4::GFP(zIs4)* and *octr-1(ok371);Phsp-4::GFP(zIs4)* egg, L1, L2, L3, L4, and young adult (YA) animals grown on *E. coli* OP50. Animals that best represent the fluorescence level of the population were shown. (B). GFP quantification of *Phsp-4::GFP* from *Phsp-4::GFP(zIs4)* and *octr-1(ok371);Phsp-4::GFP(zIs4)* egg, L1, L2, L3, L4 and YA animals exposed to *E. coli* OP50. Binary mean intensity of the region of interest (ROI) that corresponds to an entire animal was measured by NIS-Elements AR 3.2 software. N=10-20, error bars represent SEM. Asterisk indicates significant difference. *octr-1(ok371);Phsp-4::GFP(zIs4)* YA versus *Phsp-4::GFP(zIs4)* YA on *E. coli* OP50:  $P < 0.05$ .

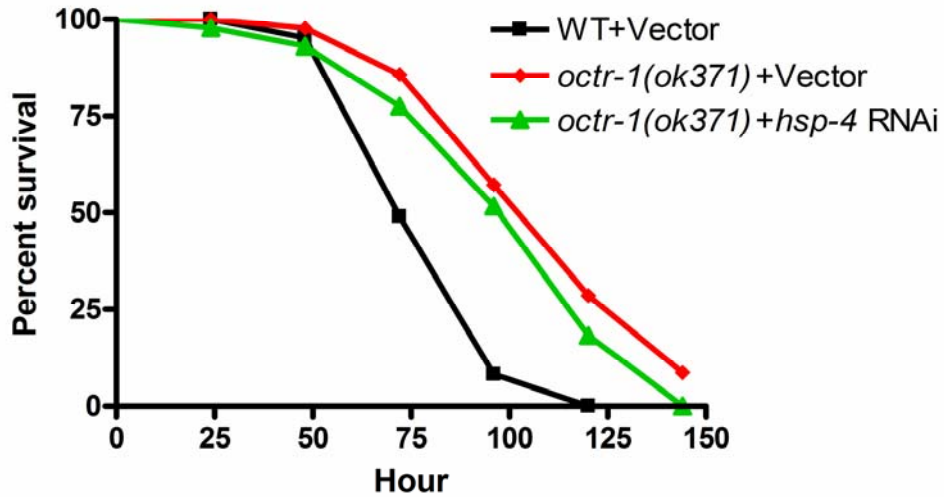

**Figure S5.** *hsp-4* RNAi does not suppress the resistant phenotype of *octr-1(ok371)* exposed to *P. aeruginosa* PA14. WT and *octr-1(ok371)* animals grown on double-stranded RNA (dsRNA) for vector control or dsRNA for *hsp-4* were exposed to *P. aeruginosa* PA14 and scored for survival over time. *P* values are relative to *octr-1(ok371)*+Vector: WT+Vector ( $p < 0.0001$ ), *octr-1(ok371)*+*hsp-4* RNAi ( $P > 0.05$ ). Shown is a representative assay of two independent experiments.
